# Supplementary material
Source: PubMed Central journal article supplement (PMC2900928)
Supplement: NIHMS206942-supplement-02.pdf [file NIHMS206942-supplement-02.pdf]

Table S1, related to Figures 2, 4-6. Doubling times<sup>1</sup> for bacterial strains used in the study.

|                 | <i>B. theta</i> | <i>B. caccae</i> | <i>B. vulgatus</i> | <i>B. uniformis</i> | <i>B. fragilis</i> | <i>B. ovatus</i> |
|-----------------|-----------------|------------------|--------------------|---------------------|--------------------|------------------|
| <b>Glucose</b>  | 1.3             | 4.8              | 2.8                | 2.0                 | 1.5                | 1.4              |
| <b>Fructose</b> | 1.2             | 13.5             | 3.2                | 2.1                 | 1.8                | 1.9              |
| <b>Sucrose</b>  | 1.6             | 1.4              | 2.4                | 2.1                 | 2.1                | 1.3              |
| <b>Levan</b>    | 2.7             | -                | -                  | -                   | -                  | -                |
| <b>FOS</b>      | 5.6             | 2.1              | 3.0                | 2.8                 | 2.0                | 1.4              |
| <b>Inulin</b>   | 96              | 2.7              | -                  | 3.9                 | 9.9                | 2.2              |

|                 | <b>BT<math>\Delta</math>1754</b> | <b>BT<math>\Delta</math>1754:</b><br><b>BT1754</b> | <b>BT<math>\Delta</math>1760</b> | <b>BT<math>\Delta</math>1760:</b><br><b>BT1760</b> | <b>BT<math>\Delta</math>1762</b> | <b>BT<math>\Delta</math>1762:</b><br><b>BT1762</b> |
|-----------------|----------------------------------|----------------------------------------------------|----------------------------------|----------------------------------------------------|----------------------------------|----------------------------------------------------|
| <b>Glucose</b>  | 2.6                              | 2.6                                                | 2.9                              | 3.4                                                | 2.1                              | ND                                                 |
| <b>Fructose</b> | 11.8                             | 2.5                                                | 2.6                              | 2.1                                                | 1.9                              | ND                                                 |
| <b>Sucrose</b>  | 8.3                              | 3.1                                                | 3.2                              | ND                                                 | 2.5                              | ND                                                 |
| <b>Levan</b>    | -                                | 2.1                                                | -                                | 3.6                                                | 19.2                             | 8.9                                                |
| <b>FOS</b>      | -                                | 3.0                                                | 5.8                              | ND                                                 | 3.8                              | 3.5                                                |
| <b>Inulin</b>   | -                                | -                                                  | -                                | -                                                  | -                                | -                                                  |

<sup>1</sup>Doubling times in hours of the Bacteroides species (top table) and the *B. thetaiotaomicron* mutants (bottom table) in minimal media containing a single carbon source. Doubling times were calculated using the KinetiCalc software (F. Breidt, 1994). ND : not determined, - : no growth.

Table S2, related to Figure 4. Kinetic parameters of *Bacteroides thetaiotaomicron* GH32 enzymes against  $\beta$ 2-6 and  $\beta$ 2-1 fructans and fructooligosaccharides

| Enzyme        | 1759                         |                          | 1760                                                                |                              | 1765                   |                                                                     | 3082                         |                        |                                                                     |
|---------------|------------------------------|--------------------------|---------------------------------------------------------------------|------------------------------|------------------------|---------------------------------------------------------------------|------------------------------|------------------------|---------------------------------------------------------------------|
|               | kcat<br>(min <sup>-1</sup> ) | K <sub>M</sub><br>(mM)   | kcat/<br>K <sub>M</sub><br>(min <sup>-1</sup><br>mM <sup>-1</sup> ) | kcat<br>(min <sup>-1</sup> ) | K <sub>M</sub><br>(mM) | kcat/<br>K <sub>M</sub><br>(min <sup>-1</sup><br>mM <sup>-1</sup> ) | kcat<br>(min <sup>-1</sup> ) | K <sub>M</sub><br>(mM) | kcat/<br>K <sub>M</sub><br>(min <sup>-1</sup><br>mM <sup>-1</sup> ) |
| Sucrose       | 816<br>±136                  | 7.8<br>±1.2              | 104                                                                 | NA <sup>a</sup>              | -                      | -                                                                   | 27087<br>±3782               | 2.2<br>±0.7            | 11286                                                               |
| Kestose       | 379<br>±75                   | 2.7<br>±0.8              | 140                                                                 | NA                           | -                      | -                                                                   | 3329<br>±922                 | 11.8<br>±3.0           | 282                                                                 |
| Kestotetraose | 706<br>±125                  | 0.9<br>±0.1              | 784                                                                 | NA                           | -                      | -                                                                   | 3829<br>±684                 | 5.1<br>±2.1            | 751                                                                 |
| Kestopentaose | 545<br>±45                   | 1.2<br>±0.1              | 454                                                                 | NA                           | -                      | -                                                                   | 4437<br>±263                 | 9.0<br>±0.0            | 456                                                                 |
| Inulin        | 156<br>±63                   | 0.3 <sup>b</sup><br>±0.1 | 520                                                                 | NA                           | -                      | -                                                                   | ~1235                        | >30 <sup>b</sup>       | -                                                                   |
| Levanbiose    | 1052<br>±209                 | 6.0<br>±0.3              | 175                                                                 | ND <sup>c</sup>              | -                      | -                                                                   | 9330<br>±1509                | 8.8<br>±0.6            | 1060                                                                |
| Levantriose   | 594<br>±129                  | 7.3<br>±0.6              | 81                                                                  | ND                           | -                      | -                                                                   | 1857<br>±67                  | 9.3<br>±0.3            | 200                                                                 |
| Levantetraose | 762<br>±175                  | 3.0<br>±1.7              | 254                                                                 | ND                           | -                      | -                                                                   | 2696<br>±181                 | 18.8<br>±1.5           | 143                                                                 |
| Levanpentaose | 737<br>±74                   | 3.0<br>±1.6              | 246                                                                 | ND                           | -                      | -                                                                   | 4043<br>±272                 | 34.7<br>±0.4           | 116                                                                 |
| Levan         | 205<br>±47                   | 1.0mg/ml<br>±0.3         | 205<br>(min <sup>-1</sup><br>mg/ml <sup>-1</sup> )                  | 32987<br>±9383               | 10.6mg/ml<br>±1.6      | 3112<br>(min <sup>-1</sup><br>mg/ml <sup>-1</sup> )                 | ~288                         | >100mg/ml              | -                                                                   |

Values shown are the mean and SD of at least 3 independent assays for each enzyme/substrate pair.

Kestoligosaccharides are  $\beta$ 2-1 linked fructose with a terminal non-reducing glucose. Levanoligosaccharides are  $\beta$ 2-6 linked fructose with no terminal glucose moiety.

<sup>a</sup>NA - No activity detected.

<sup>b</sup>mM K<sub>M</sub> for inulin based on average MW of ~4000 (Sigma; Chicory, Cat. no. I2255).

<sup>c</sup>ND - Not determined.

**Table S3. List of primers used in this study.**

**Quantitative RT-PCR**

|                |                      |
|----------------|----------------------|
| BT1754_forward | CGCAATCTGATCGATTCTCA |
| BT1754_reverse | ACACGGCTTAGTCCCATGTC |
| BT1757_forward | GTCTTTCAAACGCTGCAACA |
| BT1757_reverse | GAGCTTCGGGAACAGACTTG |
| BT1763_forward | ATGCCTGGTCACCTACGAAC |
| BT1763_reverse | CAAGCGGTCCATTCTCATT  |
| BT1765_forward | AGACCTGATGCATTGGGAAC |
| BT1765_reverse | CCATTTACTCTCCGGTGCAT |
| BT3082_forward | CACCGAACTGACTTTGCGTA |
| BT3082_reverse | CGTGGCATGAGAGAGTTTGA |
| BT3305_forward | CGGTGGGGACAAAGTATCAC |
| BT3305_reverse | AAAGTCTTTCCCGCACTGAA |

**Quantitative PCR**

|                             |                      |
|-----------------------------|----------------------|
| <i>B. theta</i> _forward    | GGGGGTATCTTCACCTTCGT |
| <i>B. theta</i> _reverse    | ATTCGGTTGAACGCTTGTCT |
| <i>B. caccae</i> _forward   | CAGCCGCTACTTTGAAGCTC |
| <i>B. caccae</i> _reverse   | TTGACGGAGGCAAAAATAGG |
| <i>B. vulgatus</i> _forward | TAGAGATCCGCCTCGTGTCT |
| <i>B. vulgatus</i> _reverse | TCCAAACGAGGAAGCCATAC |

***B. theta* mutant generation**

**BTΔ1754**

|                        |                                                     |
|------------------------|-----------------------------------------------------|
| BTΔ1754_1000up         | AAAAGGATCCACCGGAAAAGTGGAAAGTGA                      |
| BTΔ1754_750up          | AAAAGGATCCACTTTTGCTGAAAGCGGAGA                      |
| BTΔ1754_700up          | AAAAGGATCCTCCATGTCTCATTGCGCAAC                      |
| BTΔ1754_sewing_forward | CCTCTTTACGATATCAATGAAATTACATTTTCATAGTTCTTTCTGTAATCC |
| BTΔ1754_1000dwn        | AAAATCTAGATGGCATTGTTGCTGTGCTAT                      |
| BTΔ1754_750dwn         | AAAATCTAGAACACTTCCGTGCACCTCAGA                      |
| BTΔ1754_700dwn         | AAAATCTAGATCTGCTCTTTTTGGGGAATTT                     |
| BTΔ1754_sewing_reverse | GGATTACAGAAAGAACTATGAAATGTAATTTTCATTGATATCGTAAAGAGG |

**BTΔ1754:BT1754**

|                        |                                       |
|------------------------|---------------------------------------|
| BTΔ1754:BT1754_forward | AAAATCTAGAATCATTTCAGTTTTCTGTTGGTTACTT |
| BTΔ1754:BT1754_reverse | AAAAGGATCCTTAAAATCCGATGTAAAGTCCGAA    |

**BTΔ1760**

|                        |                                                     |
|------------------------|-----------------------------------------------------|
| BTΔ1760_1000up         | AAAAGGATCCCTGTAGTCGTTCCGCTGACA                      |
| BTΔ1760_750up          | AAAAGGATCCTTTGTCGGTACGGCTTCTTC                      |
| BTΔ1760_700up          | AAAAGGATCCGGATAATGTATCGATGTCCGAAT                   |
| BTΔ1760_sewing_forward | CTTGCCGGTGTAGTTTTTCATCACATTGTTGCTTATTCTTTTTATTACATA |
| BTΔ1760_1000dwn        | AAAATCTAGACAGCGTTTTGTTGCTTCGTA                      |
| BTΔ1760_750dwn         | AAAATCTAGACGGTGTCCAGTTTACGAG                        |
| BTΔ1760_700dwn         | AAAATCTAGACTGATAGCGTGTCCCCAGTT                      |

BTΔ1760\_sewing\_reverse TGTAATAAAAAGAATAAGCAACAATGTGATGAAACTACACCGGCAAG

**BTΔ1760:BT1760**

BTΔ1760:BT1760\_forward AAAATCTAGACCGGAGTTCTCAGGATTCC  
 BTΔ1760:BT1760\_sewing\_reverse CTATAGGTAAGATCATATTTTTCATCATAGGATATTCAGAGTTATACTAGTG  
 BTΔ1760:BT1760\_sewing\_forward CACTAGTATAACTCTGAATATCCTATGATGAAAAATATGATCTTACCTATAG  
 BTΔ1760:BT1760\_reverse AAAAGGATCCTCAATAAGTGCTTACCTGAACGT

**BTΔ1762**

BTΔ1762\_1000up AAAAGGATCCCGGTATCGACTTCAGCCTGTT  
 BTΔ1762\_750up AAAAGGATCCGAATTGCCGGAAACGGTAGC  
 BTΔ1762\_700up AAAAGGATCCGAAGAGTGTAGTCGGACATAC  
 BTΔ1762\_sewing\_forward CTTTCATCAATAAAAACGAATGATCATGTAACCTAACCATCTTAAAACAAAGAATA  
 BTΔ1762\_1000dwn TATTCTTTGTTTTAAGATGGTTAGTTACATGATCATTGTTTTATTGATGAAG  
 BTΔ1762\_750dwn AAAATCTAGAAGATATATTCCGGACATCGATACATT  
 BTΔ1762\_700dwn AAAATCTAGAGGGACTCGTCAGAAGACTG  
 BTΔ1762\_sewing\_reverse TATTCTTTGTTTTAAGATGGTTAGTTACATGATCATTGTTTTATTGATGAAG

**BTΔ1762:BT1762**

BTΔ1762:BT1762\_forward AAAATCTAGAATCATTTCAGTTTTCTGTTGGTACTT  
 BTΔ1762:BT1762\_sewing\_reverse CGATTGTTGCTATATATATTATCTTTTTTCATTAGTTTAAATGTTATTAATTTAAAAGTAC  
 BTΔ1762:BT1762\_sewing\_forward CGTACTTTTTAAATTAATAACATTAACTAATGAAAAAGATAATATATATAGCAACAAT  
 BTΔ1762:BT1762\_reverse AAAAGGATCCTTACCAACCGAAATTCTGTGTAT

**BTΔ1763**

BTΔ1763\_1000up AAAAGGATCCATAGACCGACTACGGGAGCA  
 BTΔ1763\_750up AAAAGGATCCGCATTAAAATCCGGCCAATA  
 BTΔ1763\_700up AAAAGGATCCCGCACCGATTTGAAAATACA  
 BTΔ1763\_sewing\_forward CATTTCGTTTTATTGATGAAGTAAGTTACATTAGTTTAAATGTTATTAATTTAAAAGTA  
 BTΔ1763\_1000dwn AAAATCTAGACAGTATCTGCGGAGTGGTCA  
 BTΔ1763\_750dwn AAAATCTAGACTTCGTTGATTCCGGTAAGG  
 BTΔ1763\_700dwn AAAATCTAGATTTTTGCAAGGTAAGCAGCA  
 BTΔ1763\_sewing\_reverse TACTTTTTAAATTAATAACATTAACTAATGTAACCTACTTCATCAATAAAAACGAATG

**BT(In+)**

BCexch\_BT1763\_forward AAAAGCGGCCGCATCATTTCAGTTTTCTGTTGGTACTT  
 BC02727\_reverse AAAATCTAGAAATGTTCTGTATTTAGGATAAAAAGATTAAA  
 BC02728-BC02731\_forward AAAATCTAGAATGAAATTGAAATATATCCTTGCGG  
 BC02728-BC02731\_reverse AAAAGGATCCTTATTGCTTCAACCGGTAGACG  
 BC\_BT1763\_sewing\_reverse TTTTGTCTTCATAACTGAGCATTAGTTTAAATGTTATTAATTTAAAAG  
 BC\_BT1763\_sewing\_forward CTTTTAAATTAATAACATTAACTAATGCTCAGTATTATGAAGAACAAAA

**Amplification of fructan PUL genes for expression<sup>1</sup>**

BT1754-PD\_F CT**CCATGG**ATGATACACCCCATTTTCGATTG  
 BT1754-PD\_R CCG**CTCGAG**GACCTGTTGTGTAGCTAC

BT1759\_F CT**CCATGG**ATGCGGATTCTCCTTTGC

BT1759\_R CCG**CTCGAG**TTTTCTTCAGTTTGTAACC  
BT1760\_F CT**CCATGG**ATAGTGACGAGACTGAC  
BT1760\_R CCG**CTCGAG**ATAAGTGCTTACCTG  
BT1765\_F CT**CCATGG**ATAAAACAACCTCTGGATAAAAC  
BT1765\_R CCG**CTCGAG**TAAACCTAATCTATACACAC  
BT3082\_F CTC**GGATCC**GGAGAAGTATCTTTTAAAATAACCAAGC  
BT3082\_R CTC**GAATTC**CTACCAAATGGATTCTACGGAAAAGAC

BT1761\_F CTC**GGATCC**TAGTGATGACTTCAAATCCGGCC  
BT1761\_R CTC**GAATTC**CTATTTACACAAGTAGTTGATTGCATTGAGAG

BT1762\_F CTC**GGATCC**GACGATTTTTTTGGACCGTCAGGTTCC  
BT1762\_R CTC**GAATTC**TTACCAACCGAAATTCTGTGTATAATTTCC

<sup>1</sup>All GH32 enzymes (except BT1765), BT1754-PD, BT1761 and BT1762 were expressed without their predicted endogenous signal peptides (<http://www.cbs.dtu.dk/services/SignalP/> and <http://www.cbs.dtu.dk/services/LipoP/>). BT1754-PD, BT1759, BT1760 and BT1765 were cloned into pET22 or pET28 (Novagen) such that the recombinant protein contained a C-terminal His<sub>6</sub> tag. BT1761, BT1762 and BT3082 were cloned into pRSETA (Invitrogen) encoding an N-terminal His<sub>6</sub> tag. Restriction sites introduced for cloning are highlighted.

**Table S4, related to Figure 3. X-ray diffraction data collection and refinement statistics for BT1754-PD.**

|                                             |                                  |
|---------------------------------------------|----------------------------------|
| <b>Data collection</b>                      |                                  |
| Space group                                 | P 65                             |
| Cell dimensions                             | a=b=111.84, c=115.171            |
| Resolution Range (Å)                        | 37-2.64 (2.78-2.64) <sup>a</sup> |
| No. of unique reflections                   | 23919 (3512)                     |
| Completeness (%)                            | 99.7 (99.7)                      |
| Redundancy                                  | 5.9 (6.0)                        |
| Rmerge                                      | 0.10 (0.35)                      |
| Mean I/(s)I                                 | 12.4 (5.6)                       |
| <b>Refinement</b>                           |                                  |
| Resolution                                  | 35.7-2.64 (2.70-2.64)            |
| Rwork                                       | 18.6 (22.8)                      |
| Rfree                                       | 23.1 (28.6)                      |
| No. non-H atoms                             | 4741                             |
| Protein                                     | 4596                             |
| Ligand                                      | 24                               |
| Water/ion                                   | 121                              |
| Mean B, all atoms (Å <sup>2</sup> )         | 36.2                             |
| Protein                                     | 36.1                             |
| Ligand                                      | 25                               |
| Water/ion                                   | 39.5                             |
| Rmsd B values (Å <sup>2</sup> ) (m.c./s.c.) | 0.5/1.1                          |
| No. Ramachandran outliers                   | 2                                |
| Rmsd bond lengths (Å)                       | 0.010                            |
| Rmsd bond angles (°)                        | 1.3                              |

<sup>a</sup> Values in parentheses refer to values in the highest resolution shell

## Supplemental Data References

- Bolam, D.N., Xie, H., Pell, G., Hogg, D., Galbraith, G., Henrissat, B., and Gilbert, H.J. (2004). X4 modules represent a new family of carbohydrate-binding modules that display novel properties. *The Journal of biological chemistry* 279, 22953-22963.
- Cho, K.H., and Salyers, A.A. (2001). Biochemical analysis of interactions between outer membrane proteins that contribute to starch utilization by *Bacteroides thetaiotaomicron*. *Journal of bacteriology* 183, 7224-7230.
- F. Breidt, T.L.R., H.P. Fleming (1994). A Rapid Method for the Determination of Bacterial Growth Kinetics. *Journal of Rapid Methods & Automation in Microbiology* 3, 59-68.
- Juncker, A.S., Willenbrock, H., Von Heijne, G., Brunak, S., Nielsen, H., and Krogh, A. (2003). Prediction of lipoprotein signal peptides in Gram-negative bacteria. *Protein Sci* 12, 1652-1662.
- Letunic, I., Doerks, T., and Bork, P. (2009). SMART 6: recent updates and new developments. *Nucleic acids research* 37, D229-232.
- Martens, E.C., Chiang, H.C., and Gordon, J.I. (2008). Mucosal glycan foraging enhances fitness and transmission of a saccharolytic human gut bacterial symbiont. *Cell host & microbe* 4, 447-457.
